# Supplementary material for: Tribbles Homolog 3 Involved in Radiation Response of Triple Negative Breast Cancer Cells by Regulating Notch1 Activation
Source: MDPI journal article supplement (doi:10.3390/cancers11020127), 2019-01-22
Supplement: s1 [file s1]

# BIOINFORMATICS & EVOLUTIONARY GENOMICS

PEOPLE ■ RESEARCH ■ GENOMES ■ PUBLICATIONS ■ SOFTWARE ■ JOBS ■ LINKS ■ INTRANET ■ PRESS

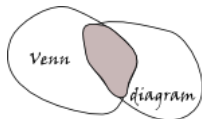

Calculate and draw custom Venn diagrams

Input files:

| List names                        | number of elements | number of unique elements |
|-----------------------------------|--------------------|---------------------------|
| AS-B244                           | 206                | 196                       |
| MDA-MB-231                        | 7101               | 6270                      |
| Overall number of unique elements |                    | 6351                      |

Image result:

AS-B244

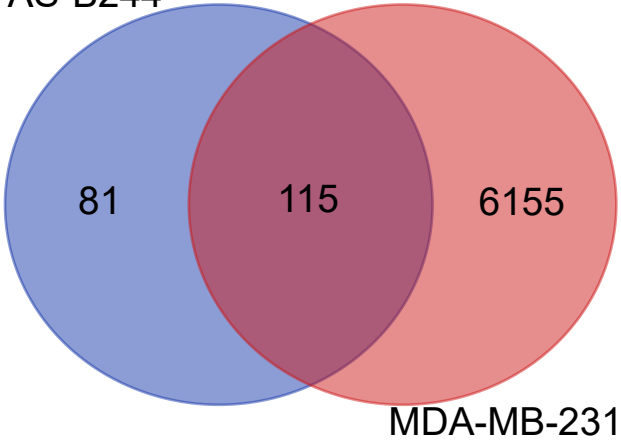

Save

Text results:

Save text

| Names      | total | elements                                                                                                                                                                                                                                                                                                                                                                                                                                                                                                                                                                                                                                                                                                                                                                                                                                                                                                                                                                                                                                                                                                                                                                                                                                                                                                                                                                                                                                                                                                                                                                                                                                                                                                                                                                                                                                                                                                                                                                                                                                                                                                                                                                                                                                                                                                                                                                                                                                                                                                                                                                                                                                                                                                                                                                                                                                                                                                                                                                                                                                                                                                                                                                                                                                                                                                                                                                                                                                                                                                                                                                                                                                                                                                                                                                                                                                                                                                                                                                                                                                                                                                                                                                                           |
|------------|-------|----------------------------------------------------------------------------------------------------------------------------------------------------------------------------------------------------------------------------------------------------------------------------------------------------------------------------------------------------------------------------------------------------------------------------------------------------------------------------------------------------------------------------------------------------------------------------------------------------------------------------------------------------------------------------------------------------------------------------------------------------------------------------------------------------------------------------------------------------------------------------------------------------------------------------------------------------------------------------------------------------------------------------------------------------------------------------------------------------------------------------------------------------------------------------------------------------------------------------------------------------------------------------------------------------------------------------------------------------------------------------------------------------------------------------------------------------------------------------------------------------------------------------------------------------------------------------------------------------------------------------------------------------------------------------------------------------------------------------------------------------------------------------------------------------------------------------------------------------------------------------------------------------------------------------------------------------------------------------------------------------------------------------------------------------------------------------------------------------------------------------------------------------------------------------------------------------------------------------------------------------------------------------------------------------------------------------------------------------------------------------------------------------------------------------------------------------------------------------------------------------------------------------------------------------------------------------------------------------------------------------------------------------------------------------------------------------------------------------------------------------------------------------------------------------------------------------------------------------------------------------------------------------------------------------------------------------------------------------------------------------------------------------------------------------------------------------------------------------------------------------------------------------------------------------------------------------------------------------------------------------------------------------------------------------------------------------------------------------------------------------------------------------------------------------------------------------------------------------------------------------------------------------------------------------------------------------------------------------------------------------------------------------------------------------------------------------------------------------------------------------------------------------------------------------------------------------------------------------------------------------------------------------------------------------------------------------------------------------------------------------------------------------------------------------------------------------------------------------------------------------------------------------------------------------------------------------|
| AS-B244    | 115   | LOC100653071 CRTAP TRIB3 ANXA3 CRELD2 SLC22A14 PHGDH GADD45B AKT2 EGFR PACS1 SLC3A2 BHLHE40 GPR56 LOC101060798 PKP3 IGFE PPAP2C ZMYND8 PACS2 NUPR1 NLGN2 CC2D1A PLS1 HSPA1A SFN KEAP1 KR1 TNFRSF12A FOSL2 MAP2K2 LOC407835 TRIM16 TRIM16L DDIT4 \ SLC38A1 ZMIZ1 AKR1C3 SEPHS2 PDIA4 SESN2 AKR1C1 LOC101060798 GOLGA4 GARS KRT18 KRT18P55 SLC38A10 HYOU1 PERP FN1 LAMB3 ZFF OSGIN1 AQP3 PMAIP1 DNM2 TMEM74B CHCHD10 SAA1 KRT7 LOXL4 SLC7A1 ZFAND2A EPAS1 MAP1LC3B2 PLAUR VAMP8 PHLDA3 RAB6A WTH3C HERPUD1 SRXN1 SLC7A5 AK4 DDIT3 WNT10A TRRAP DST HSPA1B SYVN1 F11R ATP2A2 KCNN4 PNPLA2 SLC39A6                                                                                                                                                                                                                                                                                                                                                                                                                                                                                                                                                                                                                                                                                                                                                                                                                                                                                                                                                                                                                                                                                                                                                                                                                                                                                                                                                                                                                                                                                                                                                                                                                                                                                                                                                                                                                                                                                                                                                                                                                                                                                                                                                                                                                                                                                                                                                                                                                                                                                                                                                                                                                                                                                                                                                                                                                                                                                                                                                                                                                                                                                                                                                                                                                                                                                                                                                                                                                                                                                                                                                                                                     |
| AS-B244    | 81    | CXCL3 SHBG FAM110C TACR1 UBN2 BST1 KRT15 MANF GPX2 EPB41L3 VEGFA TBC1D24 KRT9 PPP5C NTRK2 OR2H2 ESRP1 SDF2L1 LTBP3 C9orf SERPINE2 DMKN NFIX KLK5 ASNS KLK10 KRT6B PPFIA4 MFHAS1 SCN2B C1orf172 S100A9 TRIM74 TRIM73 KRT17 PPP1R1B EPS8L3 LGALS7B LGA CHODL-AS1 TFCEP2L1 ZXDA S100A14 ZRANB1 TNNI2 SLPI HSP90B1 HSP90B2P INHBB FUZ TNC HSPA6 HSPA7 UBE2M UBE2MP1 HSPA5 LOC10013                                                                                                                                                                                                                                                                                                                                                                                                                                                                                                                                                                                                                                                                                                                                                                                                                                                                                                                                                                                                                                                                                                                                                                                                                                                                                                                                                                                                                                                                                                                                                                                                                                                                                                                                                                                                                                                                                                                                                                                                                                                                                                                                                                                                                                                                                                                                                                                                                                                                                                                                                                                                                                                                                                                                                                                                                                                                                                                                                                                                                                                                                                                                                                                                                                                                                                                                                                                                                                                                                                                                                                                                                                                                                                                                                                                                                     |
| MDA-MB-231 | 6155  | MSRB1 DPM2 AACs FSTL1 CREB3L1 RPS11 PNMA1 CD44 KRTCAP2 FARP1 TMEM216 HAUS2 ITGA5 NDUFS6 TUT1 ERAL1 ECHS1 VPS4A ABCB7 P LOC401397 BRIX1 TMSB10 LMAN1 ESYT1 LCORL RAB1B GALNT3 CHD8 SUMO1 MSL1 UBAC1 DDB1 UQCR11 MYO9B TOP1MT CCNI 11-Sep GPSM2 MIER1 CHD9 DBNDD2 SYS1-DBNDD2 SEMA4D MMS22L AGPAT1 MET THRAP3 LYAR INIP GSTCD COPS7A MAX OSBPL8 PROSC NOC2L LOC40101C SLC25A14 UBA1 WDR34 ATXN10 ECH1 MAPKAPK2 FAHD1 LHFPL2 EPT1 DHRS11 CCDC34 TBC1D3G TBC1D3B LOC101060303 LOC101060287 TBC1D3 TBC1D3F TBC1D3C LOC101060506 LOC101060489 LOC101060440 LOC101060421 LOC1 TAOK3 STK25 ITGA3 BRCA1 KIAA1033 CDC25B TMEM19 STX8 LUZP1 SLK EIF4G3 NOL8 GRPEL1 BAZ1B LMNB2 ROCK2 PAM16 CORO7-PAM16 7-Mi ATL2 PDCD5 DGUOK AP1S2 RAB33B ALDOC RBM17 ZNF212 NUOT1 MANEA ACBD3 ZNF83 KIF4A KIF4B SUPT4H1 CEP350 SMYD3 CST7 RAPGEF6 RPIA LOC101060545 FAM98A EXOC3 RAD23B NCOR2 MED27 CRSP8P C19orf43 CTDSP2 CCNY DUSP4 SSU72 TIAL1 FOXM1 HIST1H1E SMUG1 OS1 ING5 F8A1 LOC642852 ALG2 PLEKHG4 PPP1R3D GRB2 NBPF15 NBPF16 LOC100288142 NBPF24 NBPF16 LOC101060226 LOC100996575 F2F TUBB RARRES3 GAS2L1 TOR3A KIAA0100 PMF1 PREP HS2ST1 CD82 PMM1 LCMT1 EIF1AX GCLM PPM1A ARL13B CAMTA1 ZNF239 PTPA42 IL24 S TOMM34 CARD8 C9orf16 ERBB2IP FUS IMMP1L RSRC1 CLCN4 AURKAPS1 AURKA PTRF CHST11 PEX11B LOC101060567 MMP15 PWP2 MTMR14 P CEP120 ZNHIT2 RICTOR SPTBN1 IRS1 LSM4 CDC42EP3 TMEM104 HSF2 SAMM50 SRP72 MFN2 POMT1 NUCB1 MTX1 LRRC8A OGFOD2 BRK1 CAPI SARS KDM2A MAN2B1 OFD1 PRDX4 ABHD12 PDP1 ATF7 ABCF2 KDM4B GNG12 HABP4 C17orf85 NSUN5P2 NSUN5P1 NSUN5 LOC101060179 SPG2 ZNF655 TMEM11 MRPL15 ARAP1 NQO2 AGPS RPUSD3 NEU1 UBE2L6 PIN1P1 MED14 HP1BP3 IPO13 MAK16 PCCB UNG TSN SPRY2 XPC KLHL7 CC NOP58 RPRD1B CHMP7 SERF1A SERF1B FKBP4 PTPN2 DOM3Z SF3A3 SLC25A51 SLC25A52 SLC25A51P1 LOC494141 AHI1 KIF14 FAM175A YIPF2 I RPL21 RPL21P28 RPL21P44 MAD2L1 EIF4A3 ATP6V1C1 CHMP2B CAMSAP1 ACO2 RPS21 RBM6 COQ10B PSMF1 SORBS2 UBE2N CYSTM1 NFE2L2 POLR2J3 UPK3BL POLR2J2 IDS PARG C1orf112 DYRK4 CXCR7 MICALL1 UIMC1 GOT2 WBSRC16 LOC653375 NFYC LOC101060301 LOC649330 HNR CIDECP CIDECD BRD4 ZNF146 POLRMT VMP1 C19orf6 NDUFA13 CD151 ARFRP1 MRPL41 NENF MTG1 SCAMP3 TTC13 ENTDP7 SOX9 CASC4 CUL4E TNKS2 TMEM241 MRT04 C1QBP NDUFB8 TMEM248 R3HDM2 PAQR3 TMED7 TRAM2 FST ARHGEF26 PAWR TLK1 TIGD2 MTMR12 RELL1 LDLR SMF FAM160B1 GPATCH8 EIF3D KIAA0930 HPS1 MPC2 KIF4A RNF7 TFE3 ZNF511 PGM1 POLR3G CPD SNRPC KCTD13 TANK RCAN1 IL8 IRF7 PELI3 SET PIGG TM9SF4 ZNF264 TAF9 TERF2 RAB5A TNFRSF1A METTL5 MSTO1 MSTO2P ACADVL ISCU GTF2H5 CECR5 ICA1L XIAP GPS1 BDP1 AKR1C3 AK IMPAD1 MGC57346 DAGLB HCFC1R1 LOC101060570 GLIPR2 SEPHS1 EHD2 SPG7 ZMYM6NB SAT2 MCM10 TCF19 RMDN3 C6orf52 NUP133 KIAA07 NT5E PARP4 FAM129B SAFB2 IL18 BEGAIN NCK2 OXA1L ADD1 PSMD12 ANP32A TRPC1 ACYL MEX3D ERCC8 CHCHD5 SMS NFAT5 NUDT22 RRAG TMEM106C CPA4 RPL39 HERC3 BTBD10 ZBTB47 MELK RABGGTB PODXL SPATS2L FAM122B CDK16 GEMIN6 HRAS BSDC1 RABL6 METTL6 ACOT SOCS4 PSM8 HN1 XRCCL1 SDR39U1 PPP6R2 ELL CDH11 ZBTB41 AHCFT1 CD52 AP2S1 C2orf69 VAT1 SENP3 FAM213A CCDC14 NSUN5 TUFM SF3 SUPT16H PHYH TOMM22 MUS81 SOCS3 UNKL ZNF839 POP4 OIP5 PPAPDC1B IL10RB TMEM132A ARHGAP10 CGRRF1 RUVL2 MCAT ARID1B RPL SRSF3 ICAM2 SH3GL1 SLC25A39 GSK3B PDXP KIF1B RALB GPD1L VPS37B C6orf120 TNFAIP3 PSRC1 PIGY PYURF PIGT ALAS1 ATG3 C17orf62 MR GLTPD2 TESK1 FBXO7 SFXN3 TSEN54 CA12 ZNF3 LRRFIP1 PPP4R1 GCLC CBX2 ZC3H14 RBMXL1 HYPK SERF2-C15ORF63 UPF1 CTDPI ZSWIM4 C GALNT10 POLC3 GPR110 MKKS STK39 ARL17B LOC100996709 ACOX3 SMURF2 BANF1 RPS6KA2 EBP HMBS SLC25A24 TOR1A ACER3 PES1 UCP2 FBRS NDUFB3 FPR1 FMNL1 DEPDC1 KIF23 ATL1 PHOSPHO2-KLHL23 KLHL23 FAM83A USP38 ZDHHC17 ARMCX3 ARHGDI8 MAGEF1 NDE1 QSOX2 NBPF3 LOC100288142 LOC101060202 NBPF11 NBPF8 LOC100996575 NBPF24 NBPF15 NBPF12 LOC101060226 LOC101060238 NBPF16 PTPN23 FAM AP1S3 UCKL1 PAM OBSL1 SLC12A7 RBM4B THAP4 FAM203B FAM203A OGFRL1 SLC39A4 MDC1 LINCO0493 STARD8 FNDCA OCEL1 ATP11B FBXO3 URGCP ZFAND1 AXL RINT1 MAF1 CD276 SPAG5 KRT80 SRP14 ACADM XP06 CCDC117 SRSF10 LOC100996657 C6orf89 DUSP3 FAM8A1 C7orf50 RT HAUS1 RAD23A MT1E MZT2B MZT2A ABCC6 ABCC6P2 ELFN2 IRAK2 SCAMP4 GHITM NDUFB7 TXLNG FOXN3 CCDC3 MIER2 PNMA2 SH3BP2 AGRN |

P1 P2 P3 P4 P5 P6 P7 P8 P9 P10 P11 P12 P13 P14 P15 P16 P17 P18 P19 P20 P21 P22 P23 P24 P25 P26 P27 P28 P29 P30 P31 P32 P33 P34 P35 P36 P37 P38 P39 P40 P41 P42 P43 P44 P45 P46 P47 P48 P49 P50 P51 P52 P53 P54 P55 P56 P57 P58 P59 P60 P61 P62 P63 P64 P65 P66 P67 P68 P69 P70 P71 P72 P73 P74 P75 P76 P77 P78 P79 P80 P81 P82 P83 P84 P85 P86 P87 P88 P89 P90 P91 P92 P93 P94 P95 P96 P97 P98 P99 P100 P101 P102 P103 P104 P105 P106 P107 P108 P109 P110 P111 P112 P113 P114 P115 P116 P117 P118 P119 P120 P121 P122 P123 P124 P125 P126 P127 P128 P129 P130 P131 P132 P133 P134 P135 P136 P137 P138 P139 P140 P141 P142 P143 P144 P145 P146 P147 P148 P149 P150 P151 P152 P153 P154 P155 P156 P157 P158 P159 P160 P161 P162 P163 P164 P165 P166 P167 P168 P169 P170 P171 P172 P173 P174 P175 P176 P177 P178 P179 P180 P181 P182 P183 P184 P185 P186 P187 P188 P189 P190 P191 P192 P193 P194 P195 P196 P197 P198 P199 P200 P201 P202 P203 P204 P205 P206 P207 P208 P209 P210 P211 P212 P213 P214 P215 P216 P217 P218 P219 P220 P221 P222 P223 P224 P225 P226 P227 P228 P229 P230 P231 P232 P233 P234 P235 P236 P237 P238 P239 P240 P241 P242 P243 P244 P245 P246 P247 P248 P249 P250 P251 P252 P253 P254 P255 P256 P257 P258 P259 P260 P261 P262 P263 P264 P265 P266 P267 P268 P269 P270 P271 P272 P273 P274 P275 P276 P277 P278 P279 P280 P281 P282 P283 P284 P285 P286 P287 P288 P289 P290 P291 P292 P293 P294 P295 P296 P297 P298 P299 P300 P301 P302 P303 P304 P305 P306 P307 P308 P309 P310 P311 P312 P313 P314 P315 P316 P317 P318 P319 P320 P321 P322 P323 P324 P325 P326 P327 P328 P329 P330 P331 P332 P333 P334 P335 P336 P337 P338 P339 P340 P341 P342 P343 P344 P345 P346 P347 P348 P349 P350 P351 P352 P353 P354 P355 P356 P357 P358 P359 P360 P361 P362 P363 P364 P365 P366 P367 P368 P369 P370 P371 P372 P373 P374 P375 P376 P377 P378 P379 P380 P381 P382 P383 P384 P385 P386 P387 P388 P389 P390 P391 P392 P393 P394 P395 P396 P397 P398 P399 P400 P401 P402 P403 P404 P405 P406 P407 P408 P409 P410 P411 P412 P413 P414 P415 P416 P417 P418 P419 P420 P421 P422 P423 P424 P425 P426 P427 P428 P429 P430 P431 P432 P433 P434 P435 P436 P437 P438 P439 P440 P441 P442 P443 P444 P445 P446 P447 P448 P449 P450 P451 P452 P453 P454 P455 P456 P457 P458 P459 P460 P461 P462 P463 P464 P465 P466 P467 P468 P469 P470 P471 P472 P473 P474 P475 P476 P477 P478 P479 P480 P481 P482 P483 P484 P485 P486 P487 P488 P489 P490 P491 P492 P493 P494 P495 P496 P497 P498 P499 P500 P501 P502 P503 P504 P505 P506 P507 P508 P509 P510 P511 P512 P513 P514 P515 P516 P517 P518 P519 P520 P521 P522 P523 P524 P525 P526 P527 P528 P529 P530 P531 P532 P533 P534 P535 P536 P537 P538 P539 P540 P541 P542 P543 P544 P545 P546 P547 P548 P549 P550 P551 P552 P553 P554 P555 P556 P557 P558 P559 P560 P561 P562 P563 P564 P565 P566 P567 P568 P569 P570 P571 P572 P573 P574 P575 P576 P577 P578 P579 P580 P581 P582 P583 P584 P585 P586 P587 P588 P589 P590 P591 P592 P593 P594 P595 P596 P597 P598 P599 P600 P601 P602 P603 P604 P605 P606 P607 P608 P609 P610 P611 P612 P613 P614 P615 P616 P617 P618 P619 P620 P621 P622 P623 P624 P625 P626 P627 P628 P629 P630 P631 P632 P633 P634 P635 P636 P637 P638 P639 P640 P641 P642 P643 P644 P645 P646 P647 P648 P649 P650 P651 P652 P653 P654 P655 P656 P657 P658 P659 P660 P661 P662 P663 P664 P665 P666 P667 P668 P669 P670 P671 P672 P673 P674 P675 P676 P677 P678 P679 P680 P681 P682 P683 P684 P685 P686 P687 P688 P689 P690 P691 P692 P693 P694 P695 P696 P697 P698 P699 P700 P701 P702 P703 P704 P705 P706 P707 P708 P709 P710 P711 P712 P713 P714 P715 P716 P717 P718 P719 P720 P721 P722 P723 P724 P725 P726 P727 P728 P729 P730 P731 P732 P733 P734 P735 P736 P737 P738 P739 P740 P741 P742 P743 P744 P745 P746 P747 P748 P749 P750 P751 P752 P753 P754 P755 P756 P757 P758 P759 P760 P761 P762 P763 P764 P765 P766 P767 P768 P769 P770 P771 P772 P773 P774 P775 P776 P777 P778 P779 P780 P781 P782 P783 P784 P785 P786 P787 P788 P789 P790 P791 P792 P793 P794 P795 P796 P797 P798 P799 P800 P801 P802 P803 P804 P805 P806 P807 P808 P809 P810 P811 P812 P813 P814 P815 P816 P817 P818 P819 P820 P821 P822 P823 P824 P825 P826 P827 P828 P829 P830 P831 P832 P833 P834 P835 P836 P837 P838 P839 P840 P841 P842 P843 P844 P845 P846 P847 P848 P849 P850 P851 P852 P853 P854 P855 P856 P857 P858 P859 P860 P861 P862 P863 P864 P865 P866 P867 P868 P869 P870 P871 P872 P873 P874 P875 P876 P877 P878 P879 P880 P881 P882 P883 P884 P885 P886 P887 P888 P889 P890 P891 P892 P893 P894 P895 P896 P897 P898 P899 P900 P901 P902 P903 P904 P905 P906 P907 P908 P909 P910 P911 P912 P913 P914 P915 P916 P917 P918 P919 P920 P921 P922 P923 P924 P925 P926 P927 P928 P929 P930 P931 P932 P933 P934 P935 P936 P937 P938 P939 P940 P941 P942 P943 P944 P945 P946 P947 P948 P949 P950 P951 P952 P953 P954 P955 P956 P957 P958 P959 P960 P961 P962 P963 P964 P965 P966 P967 P968 P969 P970 P971 P972 P973 P974 P975 P976 P977 P978 P979 P980 P981 P982 P983 P984 P985 P986 P987 P988 P989 P990 P991 P992 P993 P994 P995 P996 P997 P998 P999 1000

USP40 EEF1A2 MIPEP DUSP23 CD14 ZFX TRIP6 UCHL3 NUP35 CCDC167 WDR45B LRFN4 IFT74 C9orf116 PNISR CNTROB EI24 RAB24 CARHSP1 R  
DIAPH3 BUB3 COPB2 CTR9 SLC35E2B|SLC35E2 CCDC107 UBR1 PTTG1IP CDC27 GGH COPS6 MCCC1  
LOC401357|LINC00265|LOC100132062|LOC100133161|LOC100132287|LOC101060495|LOC729218|LOC441124|LOC100996903|FLJ45445|LOC1001333:  
PPP1R13L HEBP1 FAM86DP|FAM86HP|FAM86B1|FAM86FP|FAM86C1|FAM86JP|FAM86A|FAM86EP TTC19 GFPT1 MRPS24|URGCP-MRPS24 FAM207A  
PP2R4 PKIG TMED3 PPIL3 IP6K2 RBM34 GALNTL4 RCOR1 MKNK2 U2AF2 FCGRT YWHAG MTFR2 PPIH PRKCZ FAM200A EIF2B4 EIF5B LEO1 CEN  
PIGH CMSS1 CDC14B LDLRAP1 HHX EMC2 GTF2H1 SRSF7 ACOT13 PCNXL4 SSBP3 HECDT1 VKORC1L1 NGEP RPS6 CTNS FAM102A SFXN1 SPF  
FAM21A|FAM21B|FAM21C MAPK1 MRM1 CTNND1|TMX2-CTNND1 STAG3L3|STAG3L2|STAG3L1 ATP9A HN1L G3BP2 HNRNPA2B1 RNF216 OARD1 UT  
OXSM ZC3HC1 NUPL2 UBE3B PLAT EIF3A COA4 ATG2A PPP2R5B YRDC SPOP PTPRF BLVRA ICMT DANCER SEC24B DAZAP2 SUBS3 BOK MYEOV  
|DHRS4L2|DHRS4|DHRS4L1 RRP1 DOK1 FSCN1 TMEM136 SH3BP5 TMEM203 CBR3 UBAC2 C19orf52 NECAP1 BNIP1 KIAA0391 IGFBB6 DCLRE1A AF  
NPIPJ|LOC101059938|LOC642778|LOC101060412|LOC100288332|LOC101059953|LOC642799|PKD1P1|LOC101060394|LOC101060253|LOC101060449|  
UFSP2 REXO4 STX18 ZNF142 SLC2A6 MUT CFL1 LOC100653309|PI4KAP2|PI4KA METTL2A PIGQ BRD7 KIAA0146 PSMG1 CEP55 DTYMK ALDH16A1  
DYNLL1 CD74 ARFIP1 PLSCR1 RPSA|RPSAP58|RPSAP9|RPSAP52 MGST2 SLC35E1 EVI2B CTPS1 SLC25A11 EHD4 DENND6A EMP3 SYNCRIP LOC  
TRA2A ESCO1 RFC1 TUBA1C TRNT1 ASMTL FAM175B CRIPAK TMBIM6 TMEM38B SLC25A52|SLC25A51|LOC494141|SLC25A51P1 AKR1B1 KAL1 NFI  
LOC442459|RCC2 HLA-DRB1|HLA-DRB3|LOC100507714|LOC100507709|HLA-DRB4 ZCCHC17 NDUFA1 HSPE1 MAPK13 S100A2 C2 NOP14 ASB3|GPR  
LIG1 COPS3 PMPCB HYLS1 NBPFL15|NBPFL14|NBPFL11|NBPFL8|NBPFL12|LOC100288142|LOC101060226|LOC100996575|LOC101060238|NBPFL24|NBPFL11  
C10orf118 WWC3 CDK5RAP3 TCEA1 ARPC4 MPP5 SPA17 LHFP ACY1|ABHD14A-ACY1 C7orf55 CLPX KBTBD4 NPLC4 ROBO3 RAB34 ARSD PJA1 P  
POP1 ERLIN1 JMJ4 RNF24 SLC29A1 HIST1H2BK GLRX ALG8 S23GAL4 SHOC2 TMEM200B FBXW7 MRPL27 SRC CYB5R3 SETD1B VASN NEDD8-M  
PHF15 MAPRE2 RAB11F1P1 ARFGAP3 KIF13A YIF1A PPRC1 DLGAP5 C12orf45 TMEM14B ADIPOR1 WAC-A51 CLIP4 LOC7L3 RABEPK TTFPI PTFGE53L  
STX10 SEC62 POLC1 EIF2C2 KRT19 DNTTIP2 ENO1 PCBD1 TIPRL SNORD36A P4HA1 MAN1B1 GOSR2 SP3 AKAP8L LRRCC2 UBE2Z RNPS1 COL4A-  
STS THOC3|LOC728554 DCAF10 KANK2 IL4R SEC11A TMEM123 CCL5 TP53 SCO2 TP53 LENG1 CCDC69 EPS8L2 MNT PPP6G EMILIN2 TMEM  
C7orf73 ZCCHC11 LOX SYPL1 BAG5 RELB BUD13 LAMB2 SDE2 RPS27L MGC2752 TGFBR3 SUCO GTPBB6 CASP9 PAB2 MAP3K7 SRPR UPR7 SRA1  
RPS6KA1 ZNF746 PTPRM MRPS15 AGAP3 RAB6A|WTH3DI CPOX PPSB1 CNOT8 GORASP2 USP36 ADAM17 RBM4|RBM14-RBM4 LINC000467 TMEM1  
TMEM120A FOXO3|FOXO3B S100PBP SLC35F2 BNIP3L ATP10D CFLAR LZIC DCAKD TOR4A KIAA0226 PITRM1 GUK1 FAM210B ERCC5|BIVM-ERCC5  
IMPDH1 PPIC PRKACA SELM SPRY4 HLA-G|HLA-C ETFB SEPW1 MXD1 NMU ASXL1 TUBB4B IDH1 WDR37 AZI2 RPL8 SNHG1 XRC6S TBRG4 RAB1A  
MRPL42 FBXO38 FASTK LDB1 UBALD2 CD164 ABCC1 LMF2 LOC440563|LOC101060301|LOC649330|HNRNPCL1 IL1B HAX1 TMEM167B NUP205 WDF  
MMADHC RNF181 ADPGK LARP4 SIAE ZMPSTE24 CWC15 PFDNA PSMG3 DEDD2 TGFBI1 MT1A SNRNP200 RPL10L RPS25 TOP2B DNM1L EIF1AD  
MED19 LRRCS7 SREBF1 RNF11 SCMH1 PAGR1 GPR68 RAB18 UBTF GYB1 POLD3 NFYC|LOC494127 PHB WDYHV1 HSDL2 LPIN1 MKRN1 ANXA7 N  
COMMD9 RRP15 GPX1 GALNT1 SBNO1 RSL1D1 SLC39A1 PSME2 ADNP2 DHX58 ARCN1 PLEKH45 LIMK1 SEC24A POLR2E KIAA0101 IFTM1 BAGAL  
ERGIC2 USP28 ASB9 ATP6V0E2 CYBRD1 TRAFD1 MTCH2 MGRN1 CDA ME1 LEPREL1 MRPL30 EPHB2 MIEN1 CALM1 KDSR MCM8 M1PT1|TP1P2 NMI  
LOC101060198|MALL HNRNP1A AMIGO2 GPS2 HGS TP53RK EVPL NOL10 EDEM3 RUFY2 IFI27L2 TCOF1 SF3B3 RANBP9 CDSRF7 EVL SLC17A5 NUD  
PPM1D VPS45 TRMT61A PPP1R7 TP53BP2 SCO1 KAT2B C18orf21 GINS2 PDLIM5 SPHK2 GNPTG BRWD1 GPR108 TRADD EFCAB11 C1orf43 GOLPH  
FANGC BCL2L14 CKAP4 IFIT3 MYADM STEAP1 FAM50A PGK1 OAT AGPAT9 CDYL MLXIP PLOD1 MTFR1 NPDC1 RRN3 GPAA1 RAB12B|RAB12A C3or  
SUPV3L1 FIBP NBAS YIF1B TBCB DHCR24 MEF2D CNPY2 MYO1B B ANKRA2 NBN PANX1 C5orf45 CEP70 WAF1B ZSCAN18 FAM178A RGM6 CYBA TAF  
C1R TBC1D14 AGFG1 ER11 RASSF7 PNKP MRPS35 MATR3 CA13 UGGT1 PACSIN2 SEC23B PRKCBDD DCK RFX5 TXNDC15 SPTLC1 HLTF DHFRHD  
SYNE2 NDUFAF3 SQRDL DOCK2 NUP214 TUG1 NOSIP GABARAP FBXL6 GOLM1 DPYSL2 ARL1 SOX13 IFT46 EXOC5 KCTD14|NDUFC2-KCTD14 CDH  
KDELCE2 DUSP7 CDK11A|CDK11B VSTM2L CEP135 NRP1 SOGA2 ACAD8 APOBEC3A|APOBEC3B|APOBEC3A\_B CDCD50 FASN C20orf111 MRPS14 G  
AIDA NOM1 GPX7 TGM2 BASP1 STAM ACY2P ACTL6A LXRBM1 CLDN4 SLC22A18 RNF141 GRK6 TBK1 T1X2 MANBAL FAM46B NR1H3 VPS26A SLC44  
SNRNP70 MTHFR ACAT1 PTOV1 PTPN11 CMIP ZNF274 PHKA2 KDM5C ATF3 C7orf26 UBE2F TSSC1 WDR54 ATP5I MRPS34 NDUFA11 DAP3 RTN4R L1  
GGA3 CAPZA2 ZNF749 LPGAT1 BRMS1 MAPKAP1 THOC2 LGALS1 LOC728392 UBQLN4 TAF1B MFAP3 PCMT1 SRI SOCS6 SLC25A32 MRPL24 WDR-  
MGST3 BDNF CDKN1B LMBRD1 TEFM BTRC NDUFS8 LSM14A SLC25A16 STEAP3 ACBD6 YEAT52 RPA2 PAK6 ABCA1 CSF1 PQBP1 JTB EDC3 TNFS  
ATP13A3 CPG1 WDR43 GNG5 ACOX1 FOPNL FAM72A|FAM72B|FAM72C|FAM72D|LOC101060656 DKLH-CMTM1|CKLF SNHG11 KIF5B USP24 POLM  
GPI NOP2 ASF1B RAD9A SPOPL TAF2 COPZ1 ADAMT59 AGPAT3 DHRS7 TSEN15 CAMK2D RPS4X DHX33 CCHCR1 RPS27A RA14 LRFN3 FAM216A  
BNIP2 DHX30 TBC1D22B PTHR11 HYI GTF3A METRN MRPL54 ARID5B FLNC PRAF2 ARF1 MAU2 KRAS HNRNPH2|RPL36A-HNRNPH2 ERAP1 SPTAN1  
FNTB|CHURC1-FNTB DCTN3 EVI5 NT5C ZWILCH GET4 LSM10 PSMG2 ZNF639 ZNF407 C11orf58 C12orf10 SUN1 MYL6 RPSA CASD1 LRP21 SPMA2G  
RPS17|RPS17L OGG1 HDAC9 ZDHHC24 DYM LITAF TOM1L2 APLP1 ZNF410 ABHD15 METTL5 TMEM165 ZW10 TUBA1B C12orf29 RPS19BP1 C10orf  
GOLGA1 PIM1 USP9X IFIT2 MEA1 FAM169A NR3C1 DLX6 C4orf48 NEK7 CORO1B EMP1 TMEM171 PPN2 SERINCC2 COG2 TCEA2 TARS YY1 TRAPPCC  
C17orf75 THTPA SLC2A8 BNIP3 CARD6 MYCBP|GJA9-MYCBP LEPROT CUEDC2 DDX42 TXNRD2 C4orf19 CCDC120 MTHFD2 MIIP SS18L2 RPUSD1 C3  
LUC7L MARVELD1 ZNF76 GOLGA8B|GOLGA8A RAF1 INF2 SUB1 SGOL1 MRPS33 PRPF6 AKTIP AKIP1 RHNO1 RAMP1 HLA-DPA1 SMIM12 CLDN23 S  
COPS2 PRUNE UNC13D RTFDC1 GATAD1 SDCA CCZ1|CCZ1B FH12 SUGT1 LOC440354|LOC595101 HIGD1A LTB SNRPD1 NUDT6 NCAPG2 LPCAT2 ;  
CBWD3|CBWD5|CBWD1|CBWD7|CBWD2|CBWD6|LOC101060578 CLDND1 ITPKA BTBD2 KRT34|LOC100653049 RDBP GPATCH4 PPP2CB DHRS4|DHI  
CHUK C1orf122 MYCT1 DENND4B KYNU C11orf95 SRGAP2 GPN3 MPP1 CYBAS3 STARD3NL CD2AP CCDC86 PEX7 RPS26 TTC39C THOC1 TMEM9  
FBXO17 PSENEN GFMI1 H3F3C BABAM1 FAM168B RAD51C AP5M1 CYB56182 PARP6 ADAM10 C1orf159 SPEN ZFYVE20 CCSAP LIPA GALE FAM220  
DIEFX C10orf35 APOBEC3A|LAIR1 CRIM1 DHTKD1 SH3GLB2 MPHOSPH8 ACO1 FLNB MTIF3 CTH TULP4 MFSFD10 FAM45A|FAM45B ZNF302|ZNF181  
FAM35DP|FAM35BP|FAM35A SLC12A9 TXNL1 RNF168 PDCD2L CRYBG3 CCNYL1 DDA1 GALNT7 CISD2 MAN2A1 GBA LOC100134091|FRG1B|FRG1J|L  
PUIA CSNK1D VDAC1 NDOR1 MED6 ERLEC1 CD46 RALGDS ICOSLG PRMT6 ARFGAP2 TAF4 NDUFB6 ADRB2 TYNSD1 UTP14A TBP ER12 NHEJ1 SE  
SUMO1|SUMO1P3 TFRC NEDD1 TINF2 TMEM80 OC1AD1 DDX46 9-Sep AK12 VPS13A LHPP TES KAT6A PFDN5  
LOC100288142|NBPFL15|NBPFL8|LOC101060684|LOC101060362|LOC101060226|LOC101060202|LOC100996575|NBPFL16|NBPFL3|NBPFL11|NBPFL12|LOC1  
ZNF444 PICK1 FBN1 C12orf57 HAUS8 JOSD1 SEMA4B TYRO3 DYNC112 FANCF SNX14 LONP2 LDLOC1L CCNC TBL2 TADA1 RPS6KB2 ADRM1 PEX6 F  
ANKRD9 CPPED1 ALDOA EXOSC5 FAM92A1 MB21D1 AIMP2 PRRC1 THAP3 IQCB1 LAMA5 TMEM184B HNRNPH3 COA1 ATF4 C3orf37 BMPER EMC7  
COASY M6PR LAMC1 DOT1L MAZ CLASP2 SRP9 FAM26F PDCD10 EIF2AK3 COL13A1 SMYD2 CHMP4A TMPPRSS2 DCTN6 ACADS PVRL2 ZNF761 C1  
KARS AT7FIP CCDC8 FAM131A UFC1 EEF1A1 PSMD14 KDM3B FOXK1 PDCD2 MRPL44 B3GALT1 ETF1 MTPAP EIF4G1 UBE4A RPL21|RPL21P28 C1c  
UBE2G2 NMRAL1 ATP6V0A4 PARP1 ACS2 COP57B FGFR1L1 BTF3L4 DDX55 GOLGA7 RIN1 FERMT2 SEC23A C2CD5 CLOCK SLC35A4 MLX TMEM8  
RPL29|RPL29P2 ZNF45 ACYP1 ARPC2 PHACTRA4 AP5Z1 TK1 GAVPD1 TAF18P1 MTHFS|ST20-MTHFS ZDHHC18 LETM2 SNHG3 C10orf88 HLA-F C9or  
ST3GAL2 APIP MOXD1 CCDC84 RPS10-NUDT3|NUDT3 MYLIP PHIP FAM35A HMGN5 ODF2 AARS2 FAM103A1 SLC11A2 SMCR7L DHX32 EPB41 FAM  
MED4 IKBP1 RMI1 FAM108C1 RNF220 CARM1 TRABD PTPRS SHCBP1 NHPH4 COTL1 MYD88 ITGB1BP1 PML EBAG9 UROD COMMD4 DPP3 DAB2 TL  
ATAD3A|ATAD3B TLE1 PPARA DVL3 SERTAD3 MGLL SCFD2 ATP5SL MOSPD3 TRAPPC12 NSF TBCC TBC1D13 EBF4 SGK223 PSMG3 LSM6 SMURF1  
NBPFL15|NBPFL14|NBPFL11|NBPFL8|LOC100288142|LOC101060202|NBPFL24|NBPFL16|LOC101060684|NBPFL12|LOC101060362|LOC101060226|LOC100996  
TBF2M CPSF1 UGDH S100A4 PXDC1 C2orf29 NUP188 SLC36A1 SDPR LOXL2 CPEB2 ATAD2 LRRK1 NPEPPS DENR RARRSE2 DDRGK1 SENP2 CLIC  
WIPF2 SMARCD2 TRIM21 SBF2 PPM1B FOXRED2 CYP20A1 GLTSCR1 PEA15 RAB6C|RAB6A ZNF23 NDUFAF2 TBCA GSPT2 TRIM13 FNBP4 ATP6V0I  
FBXW5 LMRP2 YIPF1 MAP3K2 ANKRD13C TXNDC5|BLOC1S5-TXNDC5 TSPO DLK2 LEPROTL1 CLINT1 SYMPK ZNF451 REEP5 POLE2 FADD ARRDC6  
PTGR1 ITPA CALU ANKFY1 EMC4 SAP18 ZNF69 CREG1 IFIT1 LIMCH1 SERPINB6 JUNB CMPK1 RWDD1 SSH1 ENSA RHOB SAP30 XPA CKAP2 IGDC  
HADH RPAIN TET2 EPG5 TMEM245 SRSF1 RPA1 C5orf44 ACTR1B IFI30 TROVE2 EEF1E1 PLEKHM1 GLUL LAMTOR1 SPIRE1 HK2 MICB ELOVL6 MDI  
MICAL2 UBA52 PPIF MTRF1L RIPK1 CPNE3 CST1|CST4|CST2 DNPH1 PARP10 GNBL1 KIAA0195 ICAM1 RBM47 SNORD36C XAGE1D|XAGE1E|XAGE  
PNMAL1 CHIC2 ABCF3 SLC16A3 APLP2 ATPAF1 NCBP1 ADK TMEM164 SLC9A1 HDAC2 SRPRB CRYZ TT12 TGOLN2 GBAS CTBS PIGS MRPS27 EDC  
TMEM234 VAMP3 CD81 CHORDC1|LOC727896 TIMM8B TCIORG1 SH2B3 TRIM4A STAP2 TMC01 TRIM39 PAPSS1 PARL C19orf33 SIDT2 TMEM221 GRN  
DDX54 TRIP4 SNX3 FGFR1OP PTPRA STOML2 HSF1 ADLSL FTSJ1 DR1 BAP1 GLRX5 FLAD1 CAB39 RAB5C SNORA25 TMEM161A PIP4K2C CYLD ME  
CAPN5 USP48 RRM1 PA2G4 C1orf35 NEDD8 MFSFD12 CTDSP1 RUSC2 MRPS2 POLR3H ABHD11 NSRP1 RAD17 KLHL29 RPL31 KIF4K|CKLF-CMTM1 TS  
CMBL XKR8 SRSF2 CNKSR1 CEP41 SDHC GNB5 PRKAR1B AAED1 GBF1 UBTD2 VCL TGIF2-C20orf24|C20orf24 FYTDD1 TCF3 HFE SERPINE1 EIF2A  
SSSCA1 PRPF38A STAT2 EDARADD DTL PORCN ALG3 TMEM194A CENPV RNF40 CREBRF PDCD11 T1 CBP2 TMTSF3 LLPH LRRFIP2 CYTH3 INTS4 M  
SLC45A3 GXYLT1 C6orf132 C8orf76 OXSR1 TMEM219 BCCIP RAD51 RPL13A RAD51D ACN9 DLD KIAA2013 SARDH PPPIA1 RANGRF HMMR TMEM3C  
SLC39A11 LY6E GCAT GSTO1 SRD5A1|SRD5A1P1 HNRNPA3 MAD2L1BP ENPP1 LAPTM5 CETN2 PITPNM3 NOLC1 SCN11A NRBP2 IARS2 IDUA RHC  
PDCL3|PDCL3P4 UBIAD1 CYB561D1 FAM217B TMEM55A NPTN TMEM258 NRMTL1 SCAMP2 PLD3 RTKN SART3 SSGM2 UPP1 FOXPI1 AKIA1BP NDC  
FAM114A1 TJP2 KRT10 SLC9A8 RAB27A CDCP1 ARF3 CSF2RA PEX19 TXNRD3 CNP YAP1 NNT PSMD7 SC5DL SSX2IP ITPKC SIK3 RAD21 SNRPB R  
SPANXD|SPANXB1|SPANXB2|SPANXE|SPANXC|SPANXF1|SPANXA2|SPANXA1 C4BPB ORC6 PFN1 ZNF654 POMT2 SS18L1 SGOL2 ACD BCL3 M1K67I  
MORN2 P4HB TTPAL RBM27 HIATL1 ZNF282 FAM160B2 CERS2 WDR55 NUMA1 CERCAM TMEM254 C11orf31 SUPT6H GIPC1 ELL2 ZNF330 PVRL3 T  
ANKRD1 SAA2 ATP6V1D DDR1 PMEP1A ADPRHL2 FBXO18 ZZZ3 TMEM185A IGFBP4 TMED10|TMED10P1 SNRNP40 UBE3C HLA-A|HLA-H PDS2 ND  
DCTN5 TEX30 B3GALNT2 HKDC1 CLNS1A PSME3 NUP43 ZXDB FUNDC2 NMX3 EPS15L1 TNFRSF6B|RTEL1-TNFRSF6B MGEA5 UBR7 NDD3 BCAT1  
ANXA4 ALKBH3 ZFYVE19 UAP1 PARD3 IRAK4 EC11 KDM3A RPS14 MLPH ATIC APBB11P CXCL16 RETSAT ADAM15 NRG1 CAST TBC1D19 TTK TGFB1  
SPINT2 PIAS3|LOC101060431 CASK GIT2 NCAPG PXX ATP6V0E1 DKFZF586I1420 TIFA UTP11L CD274 BAX FODS LRPAP1 SLC52A2 G6PC3 RPL37 S  
FUNDC1 AMD1 GGA2 PRKCA TRIB2 CCDC115 PRMT7 SDCCAG3 TTC1 COQ2 SRF KHDC1 ATP8B1 HIPK1 MAT2A MAL2 C2orf74 CLN3 STX4 SEMA4C  
VDAC2 VHL IFI44 RPS2P32|RPS2 ZNF358 TMA7 RPS6KA3 NUSAP1 LANCL1 FAM49B C15orf40 ATP5G1 PPWD1 ERCC2 TRMU BET1 CCDC9 USP3 VF  
RNF169 CTSC MPST

**Disclaimer**

We made every attempt to ensure the accuracy and reliability of the results provided through this web service. However, the information is provided "as is" without responsibility c image(s) using our service.

**PEOPLE ■ RESEARCH ■ GENOMES ■ PUBLICATIONS ■ SOFTWARE ■ JOBS ■ LINKS ■ INTRANET ■ PRESS**

Don't hesitate to contact the [webmaster](#) in case of problems with the website!
