# Supplementary material for: Tribbles Homolog 3 Involved in Radiation Response of Triple Negative Breast Cancer Cells by Regulating Notch1 Activation
Source: MDPI journal article supplement (doi:10.3390/cancers11020127), 2019-01-22
Supplement: s1 [file s1]

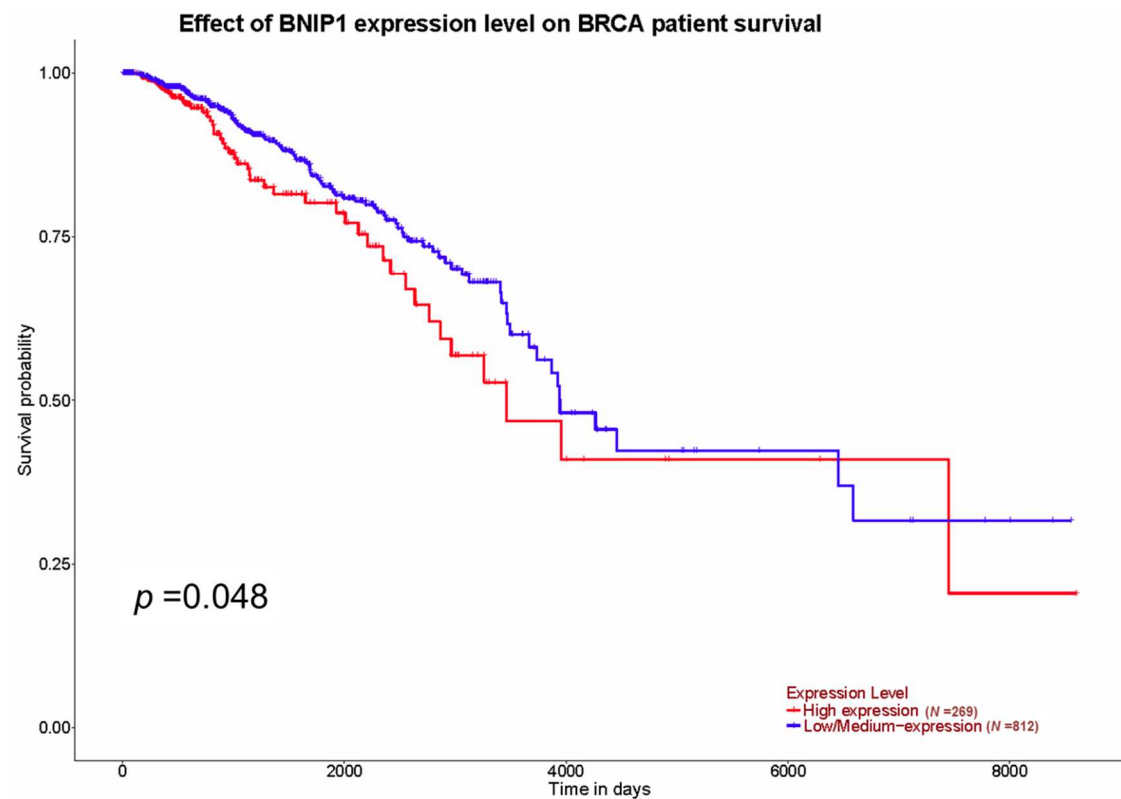

**Figure S1. The correlation of BNIP1 mRNA expression on breast cancer patients overall survival.** Effect of BNIP1 mRNA expression level on breast cancer (BRCA) patients overall survival was obtained from UALCAN web based analysis tool by analyzing TCGA's data.

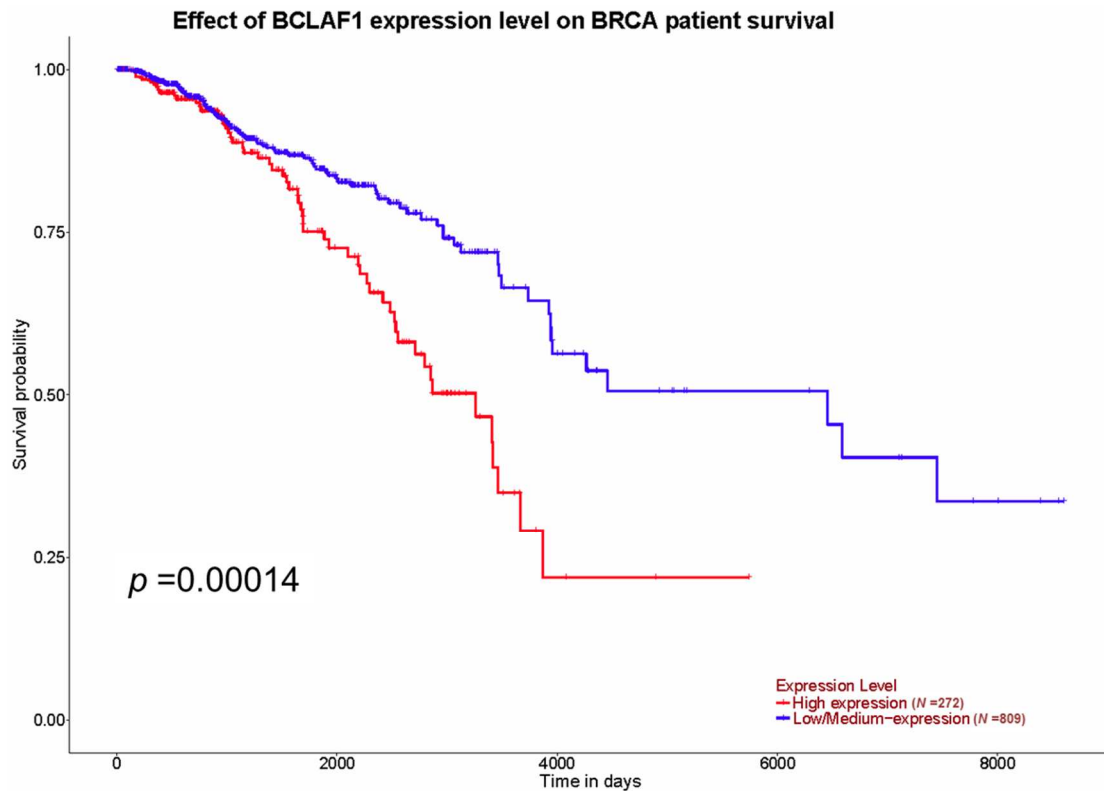

**Figure S2: The correlation of BCLAF1 mRNA expression on breast cancer patients overall survival.** Effect of BCLAF1 mRNA expression level on breast cancer (BRCA) patients overall survival was obtained from UALCAN web based analysis tool by analyzing TCGA's data.
